# Supplementary material
Source: PubMed Central journal article supplement (PMC6307985)
Supplement: blood812941-suppl1.pdf [file blood812941-suppl1.pdf]

# Supplemental Figure 1

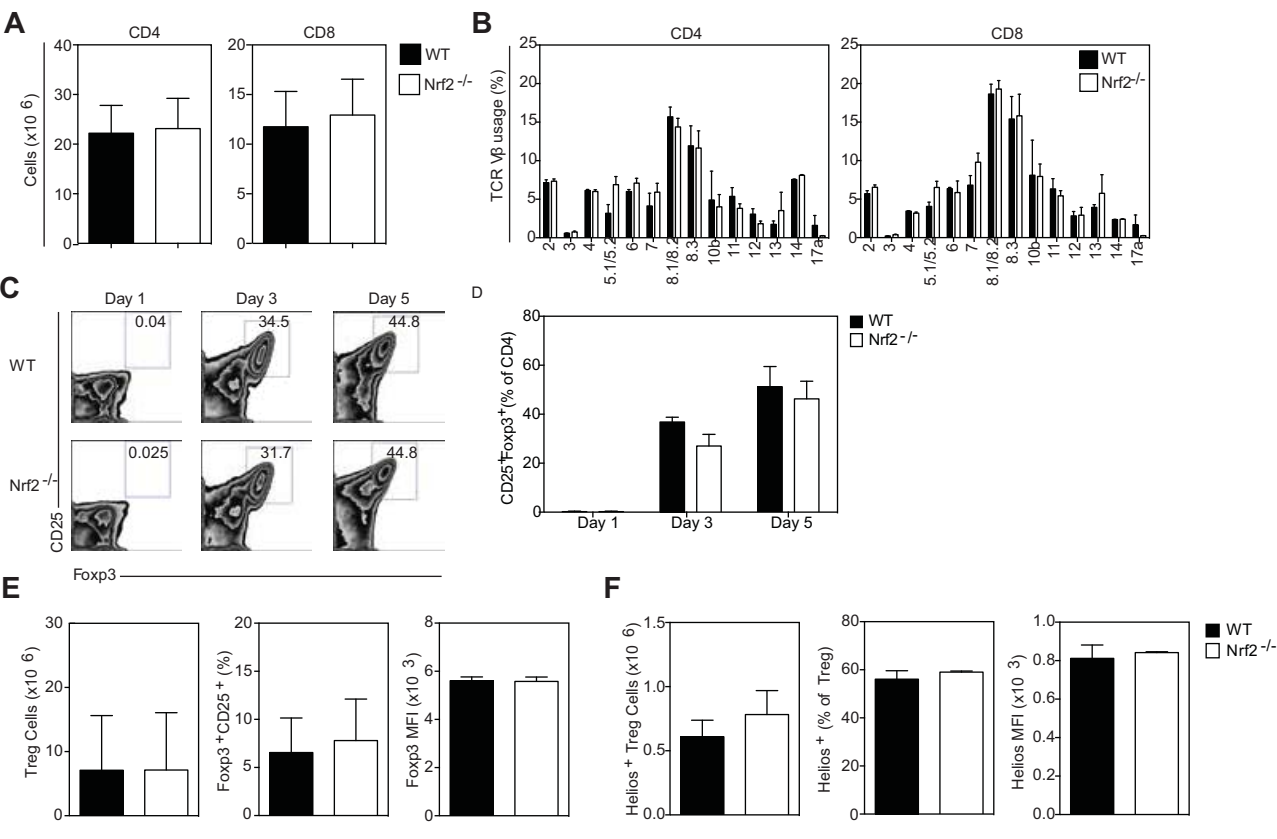

**Supplemental Figure 1. WT and Nrf2<sup>-/-</sup> splenic T cells under steady-state were examined from 8-10 week-old female mice.** (A) Absolute numbers and (B) flow cytometric analysis of TCR V $\beta$  repertoire of CD4 and CD8<sup>+</sup> T cells. Data represent mean + SD (n=8/group combined from 2 experiments). (C) Representative flow cytometric analysis and (D) bar graphs showing the percentage of naïve CD4<sup>+</sup> T cells polarized towards Treg cells in vitro using  $\alpha$ -CD3 (5ug/mL),  $\alpha$ -CD28 (2ug/mL), IL-2 (40ng/mL), and hTGF- $\beta$  (10ng/mL). Data represent mean + SD (n=4/group, 1 of 2 experiments). (E) (Left panel) Absolute number of Treg cells (CD4<sup>+</sup>CD25<sup>+</sup>Foxp3<sup>+</sup>), (Middle panel) percentage of Treg cells within CD4<sup>+</sup> population, and (Right panel) MFI of intracellular Foxp3 expression within Treg cells. Data represent mean + SD (n> 5/group, 2 experiments). (F) (Left panel) Absolute number of Helios<sup>+</sup>Treg cells, (Middle panel) percentage of Treg cells expression Helios, and (Right panel) MFI of intracellular Helios expression within Treg cells. Data represent mean + SD (n> 5/group, 2 experiments)

## Supplemental Figure 2

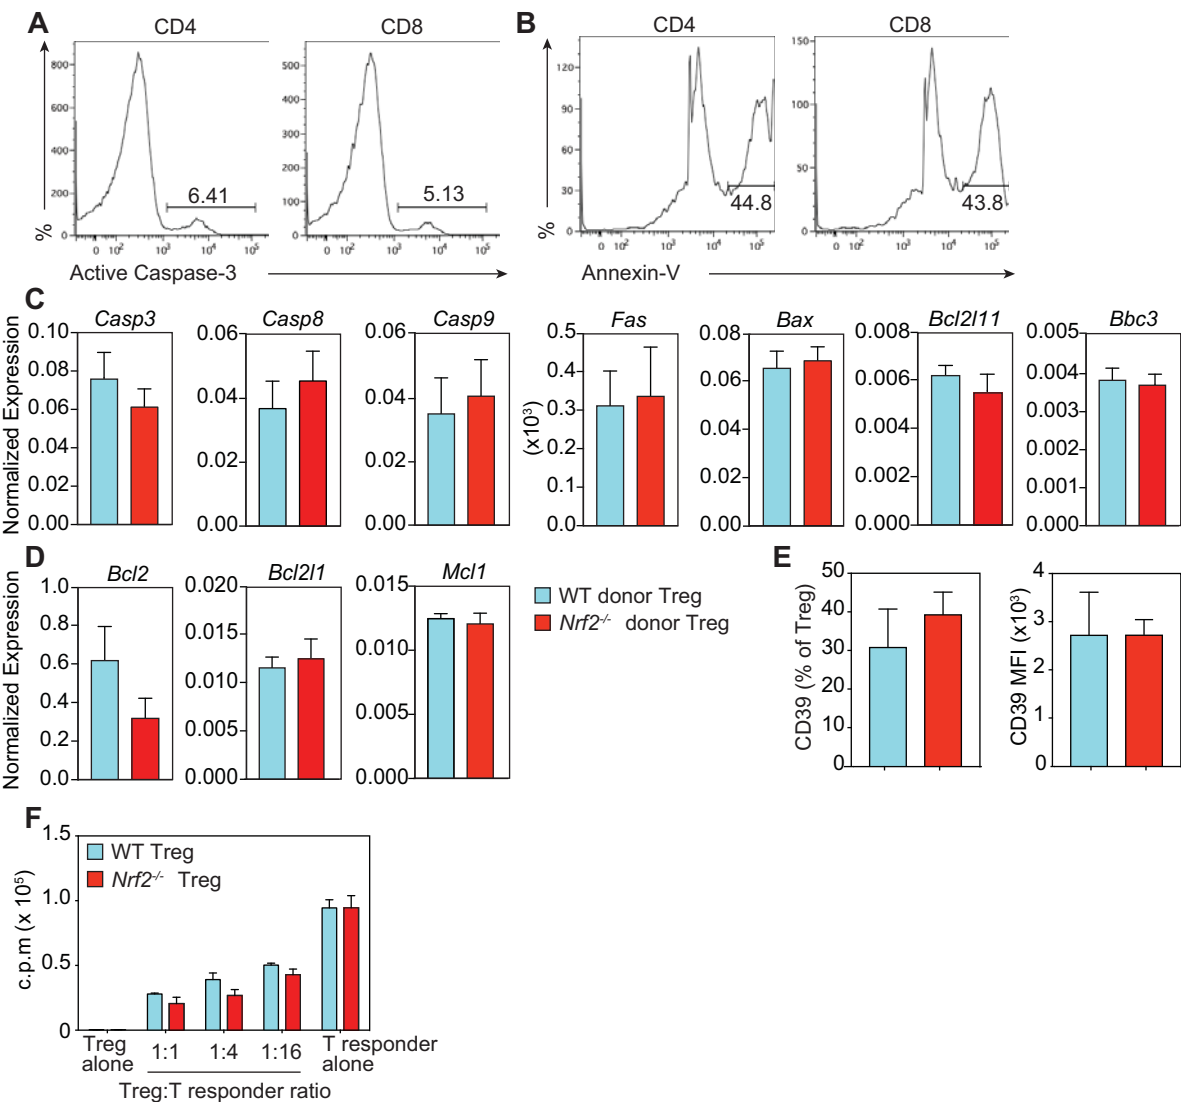

**Supplemental Figure 2. *Nrf2*<sup>-/-</sup> donor Treg cells display intact apoptosis, survival, and suppressive function.** (A–B) Combined flow cytometric histograms showing baseline (A) activated caspase-3 and (B) Annexin-V expression of magnetically purified Treg cells.  $n > 3$  animals per group, 2 experiments. (C–E) Lethally irradiated BALB/c recipients received CD45.1<sup>+</sup> WT B6 TCD-BM ( $5 \times 10^6$ ) and CD5<sup>+</sup> T cells ( $0.5 \times 10^6$ ) with CD45.2<sup>+</sup> WT or *Nrf2*<sup>-/-</sup> CD4<sup>+</sup>CD25<sup>+</sup> Treg cells ( $0.5 \times 10^6$ ). Donor Treg cells (CD45.1<sup>+</sup>CD45.2<sup>+</sup>H-Kb<sup>+</sup>CD4<sup>+</sup>CD25<sup>+</sup>) were purified using flow cytometry on day 14 of transplant. Expression of (C) proapoptotic and (D) antiapoptotic mouse gene transcripts were analyzed by quantitative PCR and normalized to *Actb* expression. (E) Expression of CD39 receptor was analyzed by flow cytometry. Data represent mean + SD of 8–9 animals per group from 2 independent experiments. (F) Thymidine incorporation of T-responder cells co-cultured with Treg cells isolated from WT or *Nrf2*<sup>-/-</sup> mice in the presence of anti-CD3/28. Data represent mean + SD of thymidine counts conducted in triplicate from 1 of 2 independent reproducible experiments.
